# Supplementary material for: A novel cyclometallated iridium(iii) complex based dual-mode phosphorescent probe for detection of acidity and bovine serum albumin
Source: Royal Society of Chemistry journal article supplement (doi:10.1039/c9ay00878k), 2019-01-01
Supplement: c9ay00878k1.pdf [file c9ay00878k1.pdf]

## Supporting information

A novel cyclometallated iridium (III) complex based dual-mode phosphorescent probe for detection of acidity and bovine serum albumin

Qixiang Chen, Sujitraj Sheth, Yuan Zhao, Qijun Song\*

Key Laboratory of Synthetic and Biological Colloids, Ministry of Education, School of Chemical and Material Engineering, Jiangnan University, Wuxi 214122, P. R. China.

\*E-mail address: [qsong@jiangnan.edu.cn](mailto:qsong@jiangnan.edu.cn)

### Table of Contents

|                                                                |                       |
|----------------------------------------------------------------|-----------------------|
| <b>1.1 Characterization Spectrum of Ir-C.....</b>              | <b>S1, S2, S3, S4</b> |
| <b>1.2 Characterization Spectrum of N-CQDs.....</b>            | <b>S5</b>             |
| <b>1.3 Optimize experimental conditions to detect BSA.....</b> | <b>S6</b>             |
| <b>1.4 Interaction mechanism between Ir-C and BSA.....</b>     | <b>S7</b>             |
| <b>1.5 Selectivity.....</b>                                    | <b>S8, S9, S10</b>    |
| <b>1.6 Interference experiment.....</b>                        | <b>S11</b>            |

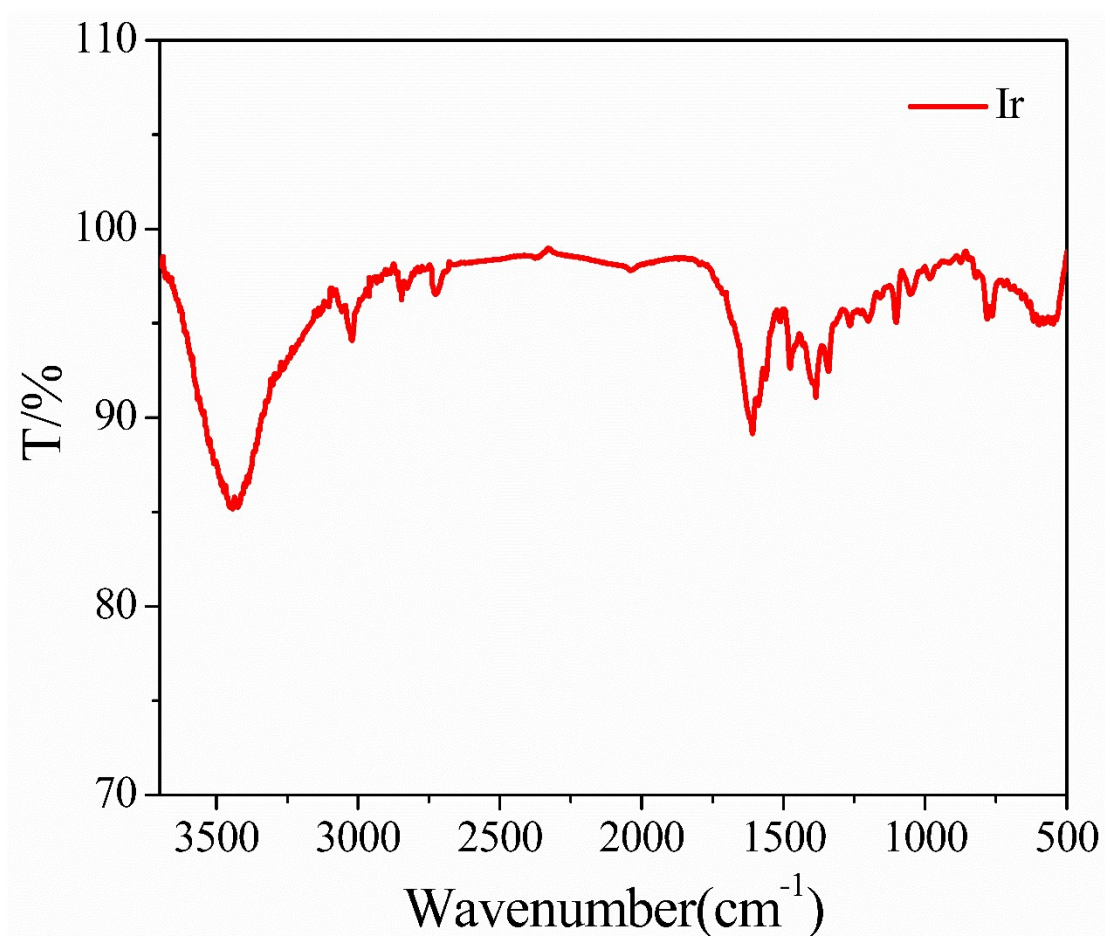

**Fig. S1** FT-IR spectrum of **Ir-C**

The sharp peak at 1680 cm<sup>-1</sup> range of the spectrum is attributed to the phenyl conjugated carbonyl peak, and the broad peak in the 3300-3500 cm<sup>-1</sup> range is the characteristic peak of the hydroxyl group. Two sharp peaks near 2820 cm<sup>-1</sup> and 2720 cm<sup>-1</sup> are attributed to the characteristic peak of the aldehyde group.

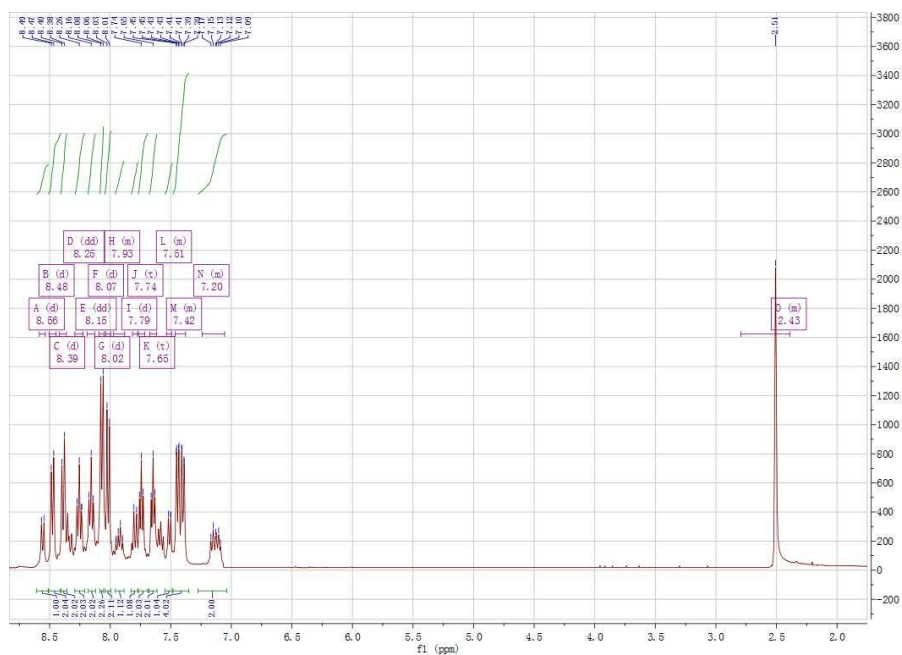

**Fig. S2**  $^1\text{H}$ -NMR spectra of **Ir-C**

$^1\text{H}$ -NMR(400MHz,DMSO),  $\delta$  (ppm): 8.56 (d,  $J = 8.59\text{Hz}$ , 1H), 8.48 (d,  $J = 8.12\text{Hz}$ , 2H), 8.39 (d,  $J = 8.20\text{Hz}$ , 2H), 8.25 (dd,  $J = 15.43, 7.72\text{Hz}$ , 2H), 8.15 (dd,  $J = 15.04, 7.36\text{Hz}$ , 2H), 8.07 (d,  $J = 7.72\text{Hz}$ , 2H), 8.02(d,  $J = 8.20\text{Hz}$ , 2H), 7.93 (m, 1H), 7.79 (d,  $J = 6.48\text{Hz}$ , 1H), 7.74 (t,  $J = 13.04, 6.57\text{Hz}$ , 2H), 7.65 (t,  $J = 12.62, 6.57\text{Hz}$ , 2H), 7.51 (m, 1H), 7.45-7.39 (m, 4H), 7.17-7.09 (m, 2H).

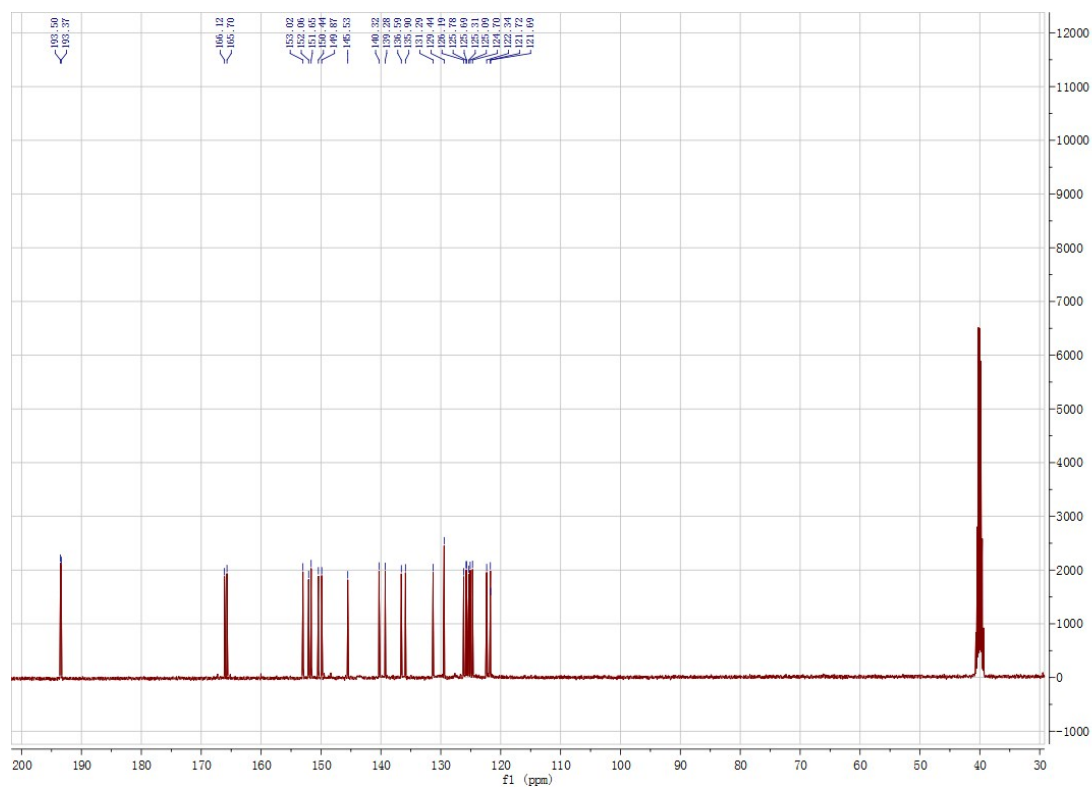

**Fig. S3**  $^{13}\text{C}$ -NMR spectra of Ir-C

$^{13}\text{C}$ -NMR (101 MHz, DMSO),  $\delta$  (ppm): 193.44, 166.12, 165.62, 153.02, 152.11, 151.65, 150.42, 149.85, 145.57, 140.31, 139.28, 136.59, 135.90, 131.29, 129.44, 126.21, 125.78, 125.31, 125.03, 124.70, 122.34, 121.72.

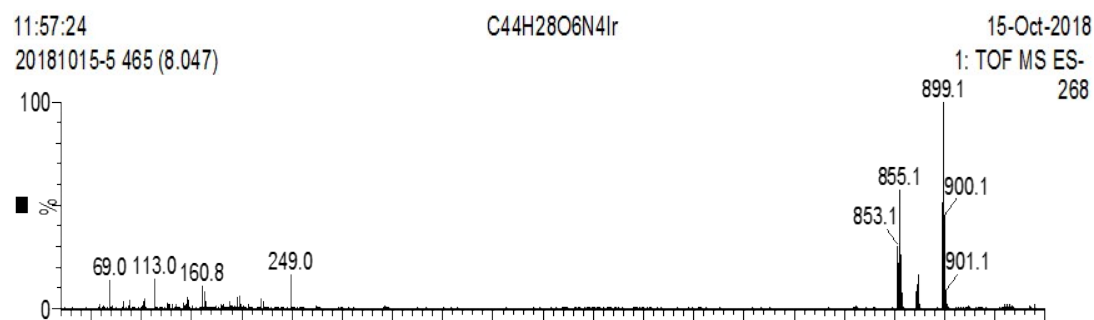

**F**

**ig. S4** Mass spectrum of Ir-C

MS (ESI-TOF) [m/z]: calc. for  $\text{C}_{44}\text{H}_{28}\text{IrN}_4\text{O}_6$ : 900.1. Actual measurement: 900.1.

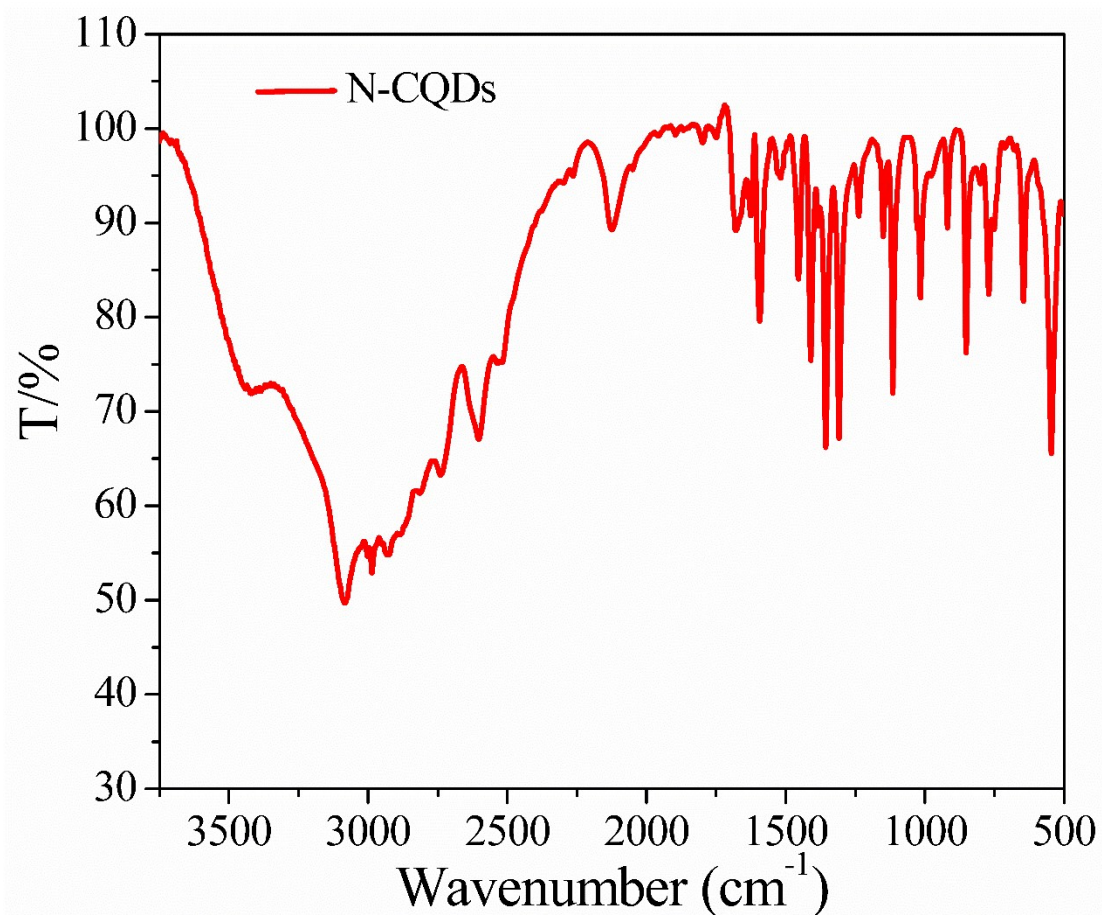

**Fig. S5** FT-IR spectrum of N-CQDs

The spectrum shows the presence of several characteristic groups, and the broad peak at  $3460\text{ cm}^{-1}$  corresponds to the stretching vibration of O-H and N-H. The sharp peaks observed at  $1025\text{ cm}^{-1}$  and  $1105\text{ cm}^{-1}$  are attributed to the stretching vibration of C-N and C-O, and the peak at  $1600\text{ cm}^{-1}$  is related to the C=C stretching vibration.

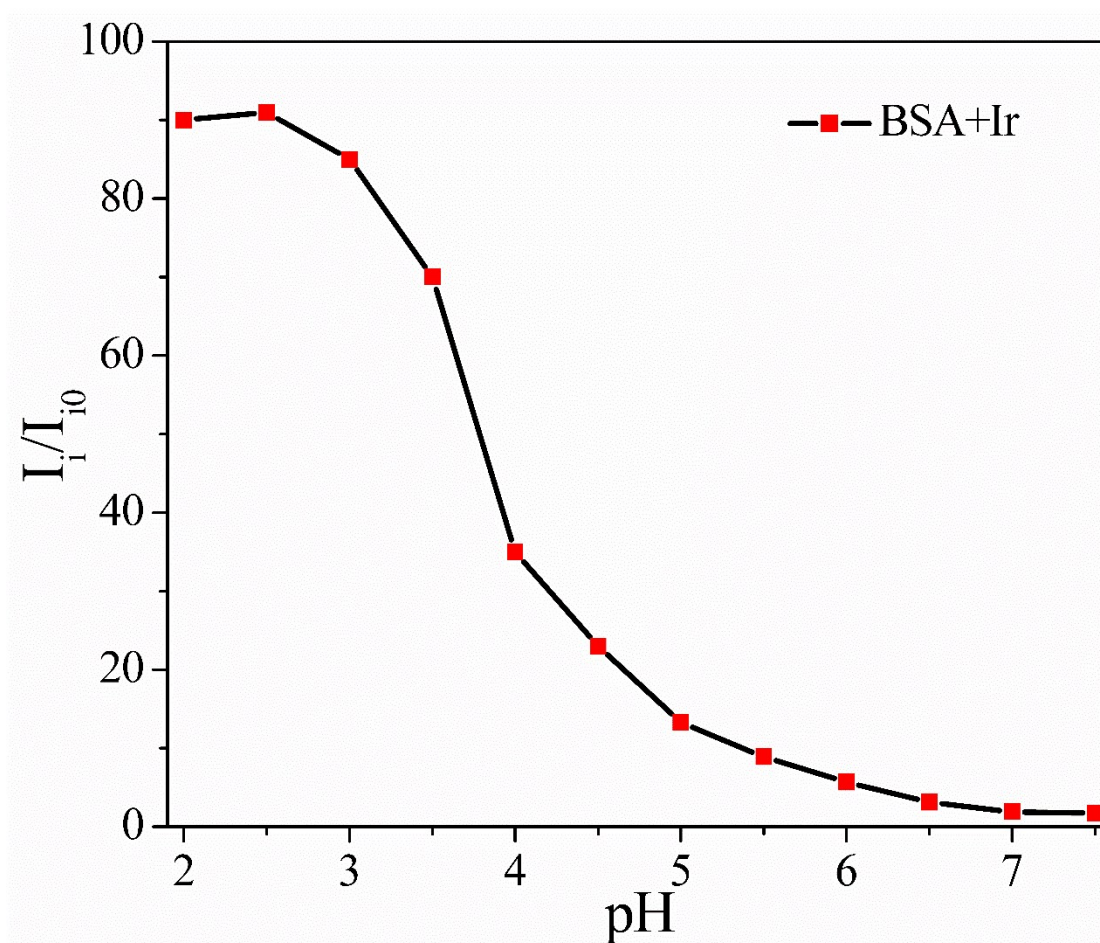

**Fig. S6** Response sensitivity at different pH values

The luminescence intensity of 0.1 mM **Ir-C** was present as a blank value in a different acidic buffer solution, and the difference value in luminescence intensity of 0.1mM **Ir-C** added to an equal concentration (0.2  $\mu$ M) BSA. Including (pH): 7.5, 7.0, 6.5, 6.0, 5.5, 5.0, 4.5, 4.0, 3.5, 3.0, 2.5, 2.0.

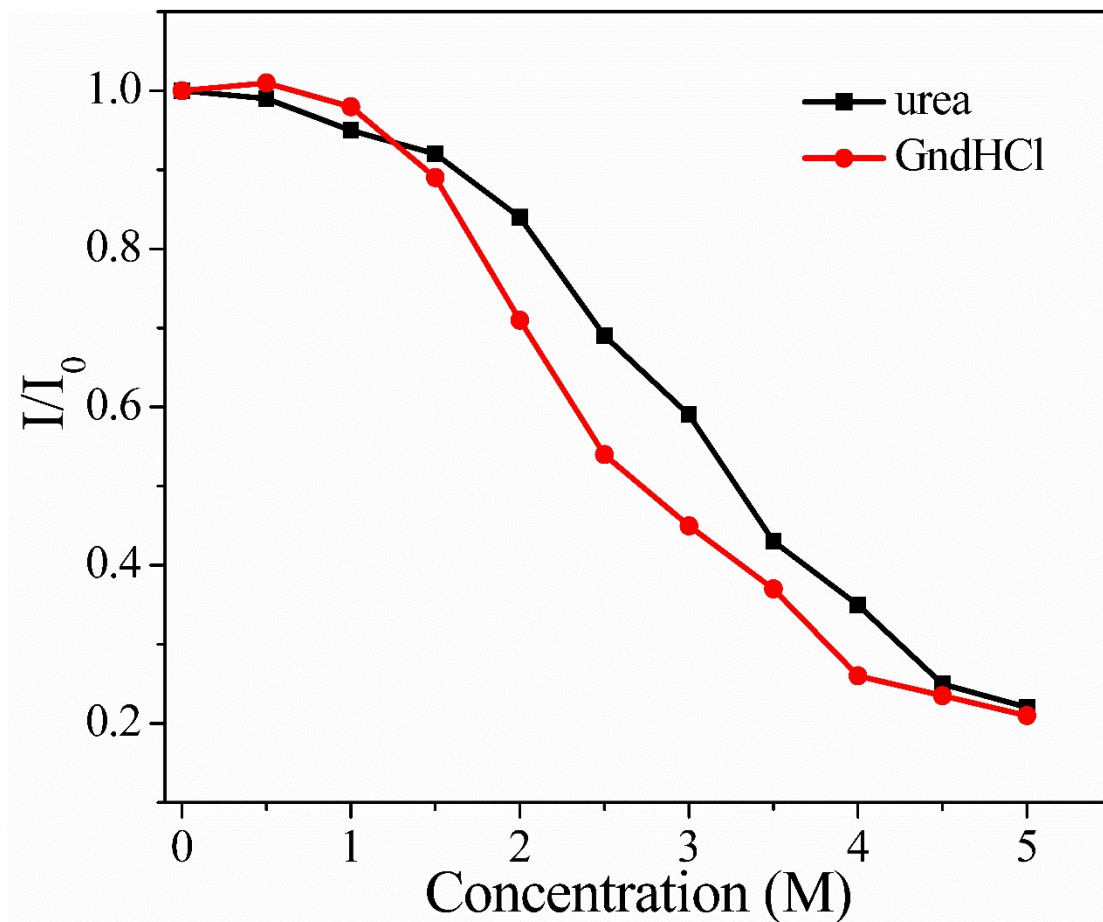

**Fig. S7** Luminescence intensity of (0.1 mM-0.2  $\mu$ M) Ir-C•BSA (pH 2.5) in the presence of different concentrations of protein unfolding agent (urea, GndHCl). Includes: 0.5 M, 1.0 M, 1.5 M, 2.0 M, 2.5 M, 3.0 M, 3.5 M, 4.0 M, 4.5 M, 5.0 M

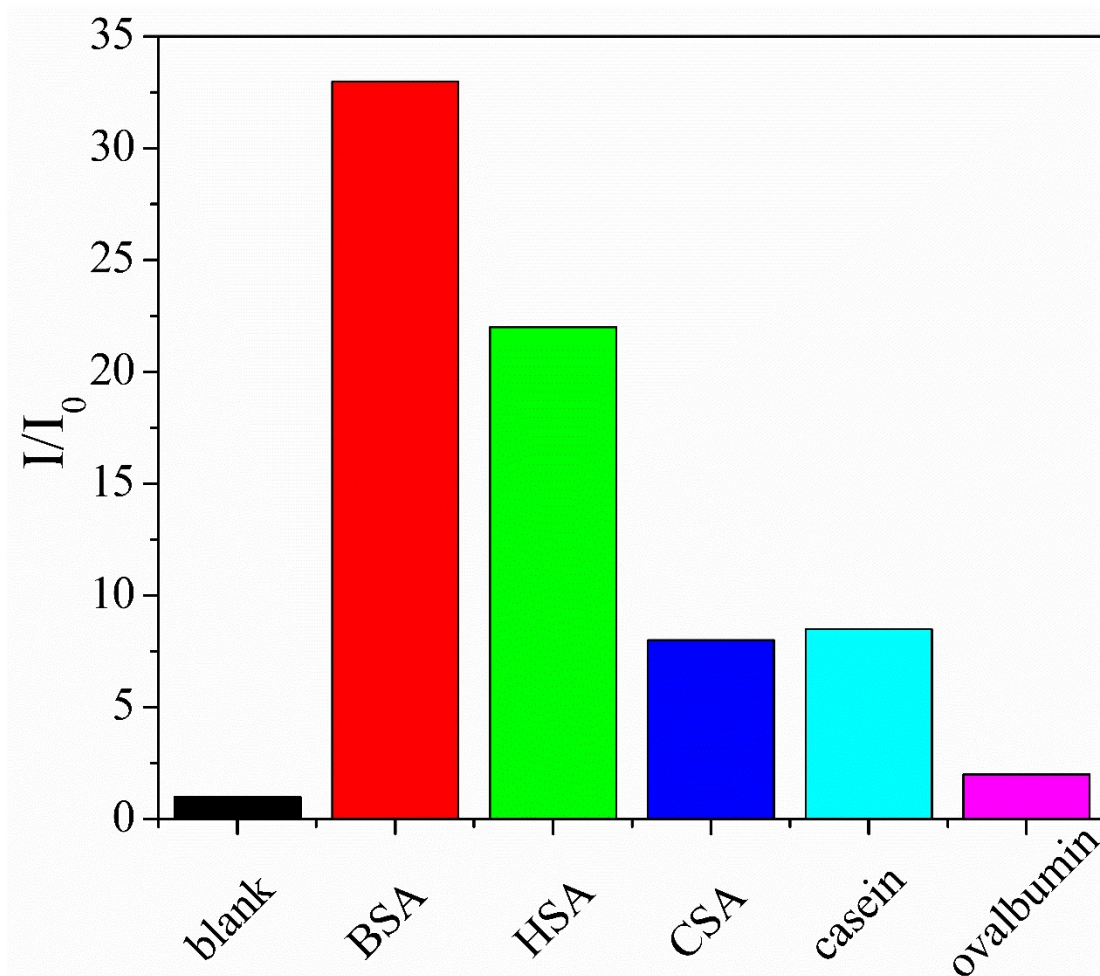

**Fig. S8** Luminescence intensity of 0.1 mM Ir-C in the presence of the same concentration of BSA, HSA, CSA, casein, ovalbumin.



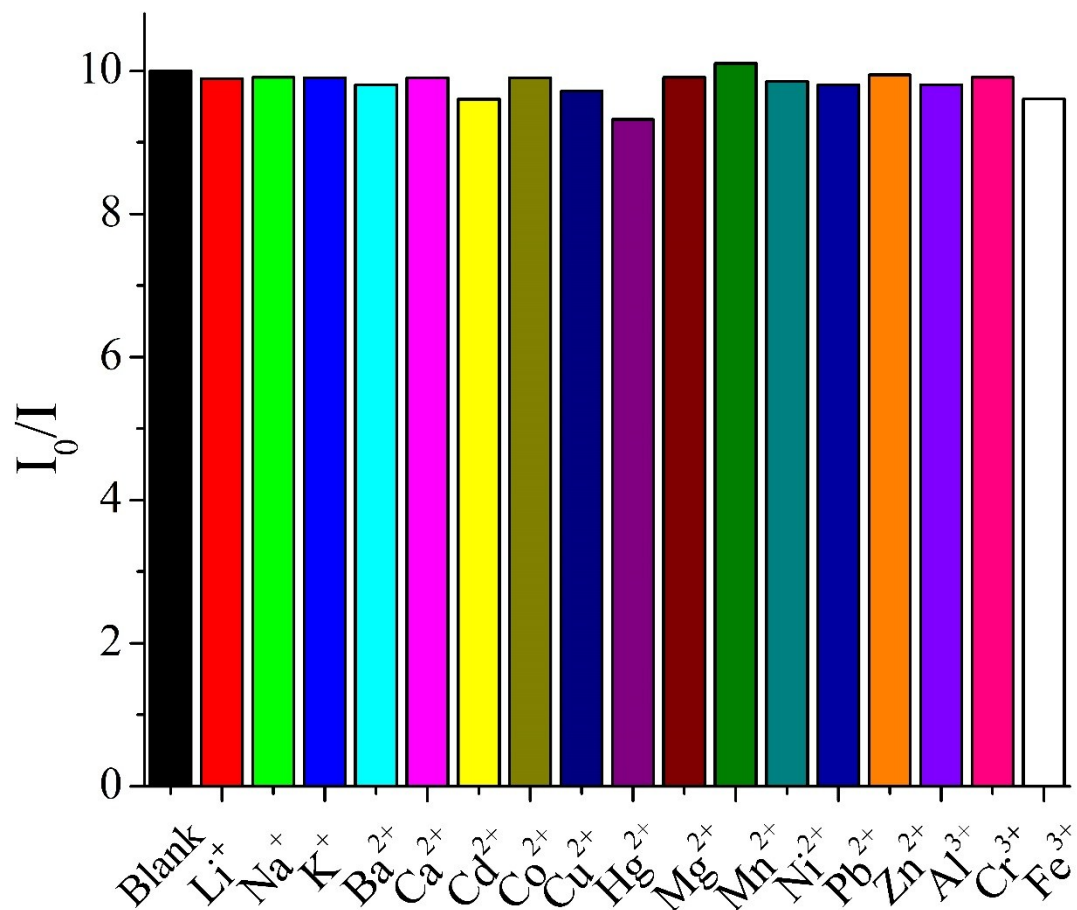

**Fig. S9** At pH7.0: Luminescence intensity of the 0.1 mM(1 equiv) Ir-C in the presence of 10 equiv of  $\text{Li}^+$ ,  $\text{Na}^+$ ,  $\text{K}^+$ ,  $\text{Ba}^{2+}$ ,  $\text{Ca}^{2+}$ ,  $\text{Cd}^{2+}$ ,  $\text{Co}^{2+}$ ,  $\text{Cu}^{2+}$ ,  $\text{Hg}^{2+}$ ,  $\text{Mg}^{2+}$ ,  $\text{Mn}^{2+}$ ,  $\text{Ni}^{2+}$ ,  $\text{Pb}^{2+}$ ,  $\text{Zn}^{2+}$ ,  $\text{Al}^{3+}$ ,  $\text{Cr}^{3+}$ , and  $\text{Fe}^{3+}$  ions.

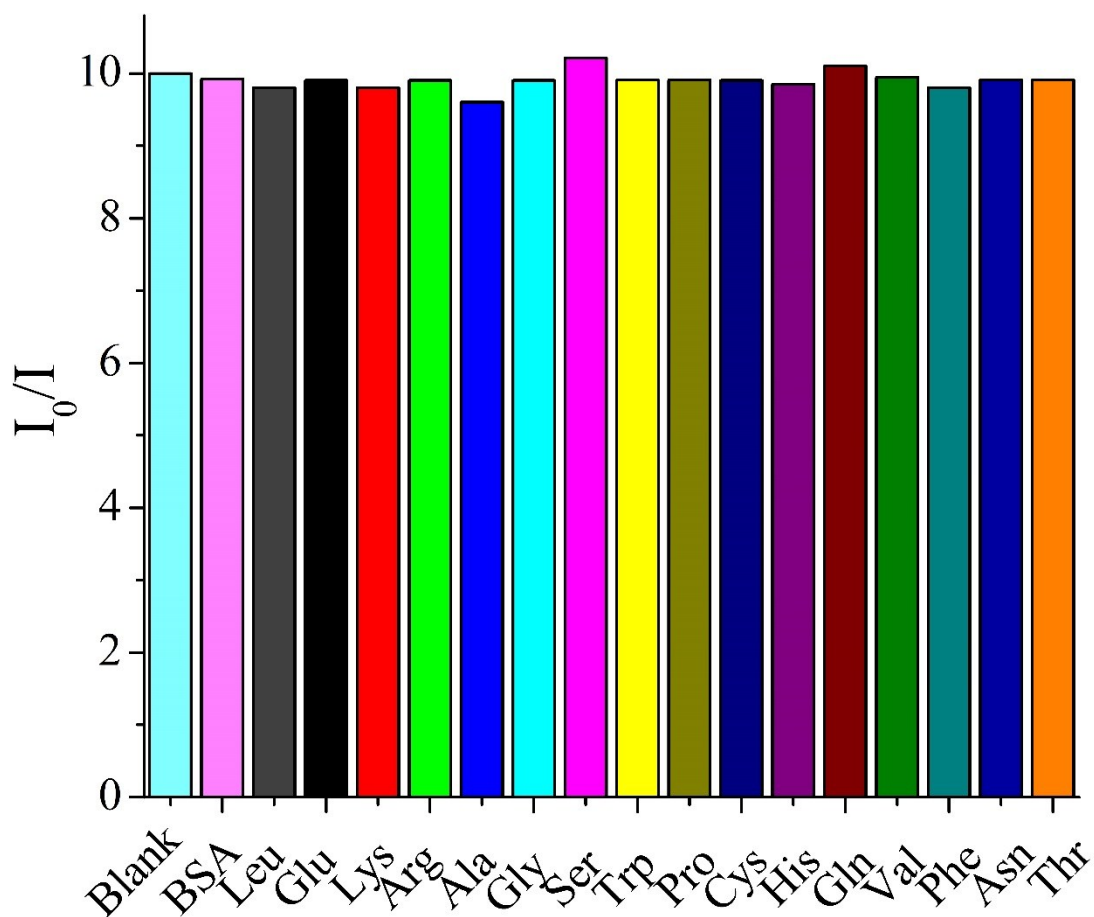

**Fig. S10** At pH7.0: Luminescence intensity of the 0.1 mM (1 equiv) Ir-C in the presence of 10 equiv of BSA, Leu, Glu, Lys, Arg, Ala, Gly, Ser, Trp, Pro, Cys, His, Gln, Val, Phe, Asn and Thr

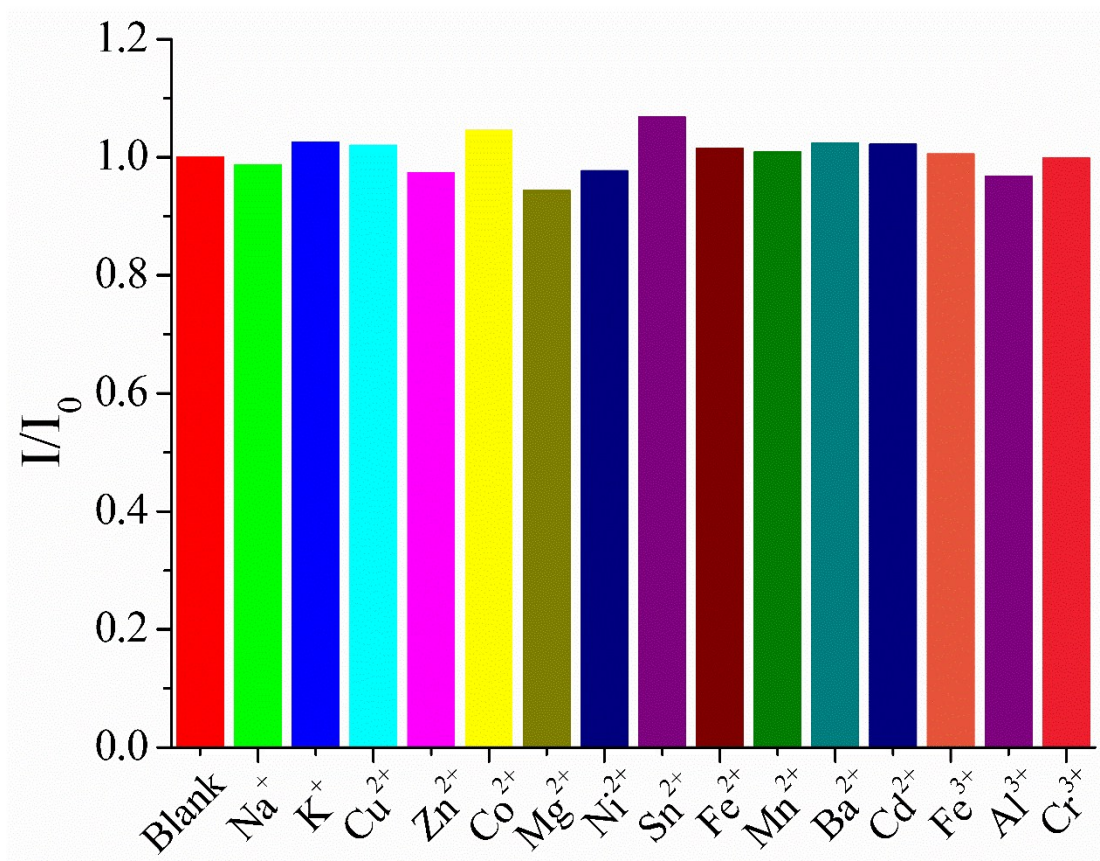

**Fig. S11** Luminescence intensity of the Ir-C and BSA solution (1equiv) in the presence of 100 equiv of  $\text{Na}^+$ ,  $\text{K}^+$ ,  $\text{Cu}^{2+}$ ,  $\text{Zn}^{2+}$ ,  $\text{Co}^{2+}$ ,  $\text{Mg}^{2+}$ ,  $\text{Ni}^{2+}$ ,  $\text{Sn}^{2+}$ ,  $\text{Fe}^{2+}$ ,  $\text{Mn}^{2+}$ ,  $\text{Ba}^{2+}$ ,  $\text{Cd}^{2+}$ ,  $\text{Fe}^{3+}$ ,  $\text{Al}^{3+}$  and  $\text{Cr}^{3+}$  ions.
